# Supplementary material
Source: PubMed Central journal article supplement (PMC9110556)
Supplement: NIHMS1756768-supplement-fS1.pdf [file NIHMS1756768-supplement-fS1.pdf]

Ovid

Database(s): EBM Reviews - Cochrane Central Register of Controlled Trials March 2021, EBM Reviews - Cochrane Database of Systematic Reviews 2005 to April 8, 2021, Embase 1974 to 2021 April 09 , Ovid MEDLINE(R) and Epub Ahead of Print, In-Process, In-Data-Review & Other Non-Indexed Citations and Daily 1946 to April 09, 2021

Search Strategy:

| #  | Searches                                                                                                                                                                                                                                                                                                                                                                                                                                                                                                                                        | Results |
|----|-------------------------------------------------------------------------------------------------------------------------------------------------------------------------------------------------------------------------------------------------------------------------------------------------------------------------------------------------------------------------------------------------------------------------------------------------------------------------------------------------------------------------------------------------|---------|
| 1  | exp Arthritis, Psoriatic/<br>("alibert bazin disease" or "arthritic psoriasis" or "arthritis psoriatica" or "arthropathic psoriasis" or "psoriasis arthropathica" or "psoriasis pustulosa                                                                                                                                                                                                                                                                                                                                                       | 31712   |
| 2  | arthropathica" or "psoriatic arthritis" or "psoriatic arthropathies" or "psoriatic arthropathy" or "psoriatic polyarthritis" or "psoriatic rheumatism" or "psoriatic rheumatoid arthritis").ti,ab,hw,kw.                                                                                                                                                                                                                                                                                                                                        | 39592   |
| 3  | 1 or 2                                                                                                                                                                                                                                                                                                                                                                                                                                                                                                                                          | 40755   |
| 4  | exp Spondylitis, Ankylosing/<br>("ankylating spondylitis" or "ankylopoietic spondylarthritis" or "ankylopoietic spondylitis" or "ankylosing spine" or "ankylosing spondilitis" or "Ankylosing Spondylarthritides" or "Ankylosing Spondylarthritis" or "ankylosing spondylarthrosis" or "Ankylosing Spondylitis" or "Ankylosing Spondyloarthritides" or "Ankylosing Spondyloarthritis" or "ankylosis spondylitis" or "ankylotic spondylitis" or "axial spondyloarthritis" or axSpA or "Bechterew                                                 | 43653   |
| 5  | Disease" or "Bechterews Disease" or "bekhterev disease" or "bekhterevs disease" or "Marie-Struempell Disease" or "Marie-Struempells Disease" or "morbus bechterew" or "nr-axSpA" or "r-axSpA" or "Rheumatoid Spondylitis" or "spinal ankylosis" or "spine ankylosis" or "Spondylarthritis Ankylopoietica" or "spondylarthritis ankylosans" or "spondylarthrosis ankylopoietica" or "spondylitis ankylopoetica" or "Spondylitis Ankylopoietica" or Spondyloarthrit* or "Spondyloarthritis Ankylopoietica" or "vertebral ankylosis").ti,ab,hw,kw. | 60276   |
| 6  | 4 or 5                                                                                                                                                                                                                                                                                                                                                                                                                                                                                                                                          | 64113   |
| 7  | 3 or 6                                                                                                                                                                                                                                                                                                                                                                                                                                                                                                                                          | 93644   |
| 8  | exp survival/                                                                                                                                                                                                                                                                                                                                                                                                                                                                                                                                   | 1200489 |
| 9  | exp death/                                                                                                                                                                                                                                                                                                                                                                                                                                                                                                                                      | 897691  |
| 10 | exp mortality/                                                                                                                                                                                                                                                                                                                                                                                                                                                                                                                                  | 1560788 |
| 11 | mortality.fs.                                                                                                                                                                                                                                                                                                                                                                                                                                                                                                                                   | 599582  |
| 12 | exp survival analysis/                                                                                                                                                                                                                                                                                                                                                                                                                                                                                                                          | 357431  |
| 13 | (surviv* or death* or mortalit* or fatalit*).ti,ab,hw,kw.                                                                                                                                                                                                                                                                                                                                                                                                                                                                                       | 7147369 |
| 14 | or/8-13                                                                                                                                                                                                                                                                                                                                                                                                                                                                                                                                         | 7513288 |
| 15 | 7 and 14                                                                                                                                                                                                                                                                                                                                                                                                                                                                                                                                        | 6035    |
| 16 | exp Risk Assessment/ or exp Risk/ or exp Risk Factors/                                                                                                                                                                                                                                                                                                                                                                                                                                                                                          | 3929696 |
| 17 | exp proportional hazards models/                                                                                                                                                                                                                                                                                                                                                                                                                                                                                                                | 179034  |
| 18 | exp Regression Analysis/                                                                                                                                                                                                                                                                                                                                                                                                                                                                                                                        | 916134  |

|    |                                                                                                                                                                                                                                                                                                                                                                                                                                                                                                                                                                                                                |          |
|----|----------------------------------------------------------------------------------------------------------------------------------------------------------------------------------------------------------------------------------------------------------------------------------------------------------------------------------------------------------------------------------------------------------------------------------------------------------------------------------------------------------------------------------------------------------------------------------------------------------------|----------|
| 19 | (CI or CIs or "confidence interval*" or "cox analyses" or "cox analysis" or "Cox model*" or "Cox multivariate analyses" or "Cox multivariate analysis" or "cox multivariate model*" or "Cox survival analyses" or "Cox survival analysis" or "Cox survival model*" or "hazard analyses" or "hazard analysis" or "hazard model*" or "odds ratio*" or rate or rates or ratio or ratios or regression* or risk or risks or RR or RRs or SMR or SMRs).ti,ab,hw,kw.                                                                                                                                                 | 16921168 |
| 20 | 16 or 17 or 18 or 19                                                                                                                                                                                                                                                                                                                                                                                                                                                                                                                                                                                           | 16987821 |
| 21 | 15 and 20<br>limit 21 to (editorial or erratum or note or addresses or autobiography or bibliography or biography or blogs or comment or dictionary or directory or interactive tutorial or interview or lectures or legal cases or legislation or news or newspaper article or overall or patient education handout or periodical index or portraits or published erratum or video-audio media or webcasts) [Limit not valid in CCTR,CDSR,Embase,Ovid MEDLINE(R),Ovid MEDLINE(R) Daily Update,Ovid MEDLINE(R) PubMed not MEDLINE,Ovid MEDLINE(R) In-Process,Ovid MEDLINE(R) Publisher; records were retained] | 4146     |
| 22 |                                                                                                                                                                                                                                                                                                                                                                                                                                                                                                                                                                                                                | 76       |
| 23 | 21 not 22                                                                                                                                                                                                                                                                                                                                                                                                                                                                                                                                                                                                      | 4070     |
| 24 | remove duplicates from 23                                                                                                                                                                                                                                                                                                                                                                                                                                                                                                                                                                                      | 3124     |

## Scopus

- 1 TITLE-ABS-KEY("alibert bazin disease" or "arthritic psoriasis" or "arthritis psoriatica" or "arthropathic psoriasis" or "psoriasis arthropathica" or "psoriasis pustulosa arthropathica" or "psoriatic arthritis" or "psoriatic arthropathies" or "psoriatic arthropathy" or "psoriatic polyarthritis" or "psoriatic rheumatism" or "psoriatic rheumatoid arthritis")
- 2 TITLE-ABS-KEY("ankylating spondylitis" or "ankylopoietic spondylarthritis" or "ankylopoietic spondylitis" or "ankylosing spine" or "ankylosing spondilitis" or "Ankylosing Spondylarthritis" or "Ankylosing Spondylarthritis" or "ankylosing spondylarthrosis" or "Ankylosing Spondylitis" or "Ankylosing Spondyloarthritis" or "Ankylosing Spondyloarthritis" or "ankylosis spondylitis" or "ankylotic spondylitis" or "axial spondyloarthritis" or axSpA or "Bechterew Disease" or "Bechterews Disease" or "bekhterev disease" or "bekhterevs disease" or "Marie-Struempell Disease" or "Marie-Struempells Disease" or "morbus bechterew" or "nr-axSpA" or "r-axSpA" or "Rheumatoid Spondylitis" or "spinal ankylosis" or "spine ankylosis" or "Spondylarthritis Ankylopoietica" or "spondylarthritis ankylosans" or "spondylarthrosis ankylopoietica" or "spondylitis ankylopoetica" or "Spondylitis Ankylopoietica" or Spondyloarthrit\* or "Spondyloarthritis Ankylopoietica" or "vertebral ankylosis")
- 3 TITLE-ABS-KEY(surviv\* or death\* or mortalit\* or fatalit\*)
- 4 TITLE-ABS-KEY(CI OR CIs OR "confidence interval\*" OR "cox analyses" OR "cox analysis" OR "Cox model\*" OR "Cox multivariate analyses" OR "Cox multivariate analysis" OR "cox multivariate model\*" OR "Cox survival analyses" OR "Cox survival analysis" OR "Cox survival model\*" OR "hazard analyses" OR "hazard analysis" OR "hazard model\*" OR "odds ratio\*" OR rate OR rates OR ratio OR ratios OR regression\* OR risk OR risks OR RR OR RRs OR SMR OR SMRs)
- 5 (1 or 2) and 3 and 4
- 6 DOCTYPE(ed) OR DOCTYPE(bk) OR DOCTYPE(er) OR DOCTYPE(no) OR DOCTYPE(sh)
- 7 5 and not 6
- 8 INDEX(embase) OR INDEX(medline) OR PMID(0\* OR 1\* OR 2\* OR 3\* OR 4\* OR 5\* OR 6\* OR 7\* OR 8\* OR 9\*)
- 9 7 and not 8
