# Supplementary material
Source: PubMed Central journal article supplement (PMC9110556)
Supplement: NIHMS1756768-supplement-fS2.pdf [file NIHMS1756768-supplement-fS2.pdf]

| Author, year             | Selection                                                    |                                                    |                                      | Comparability                                                           |                                      | Outcome                       |                            |                                   | Overall risk of bias |
|--------------------------|--------------------------------------------------------------|----------------------------------------------------|--------------------------------------|-------------------------------------------------------------------------|--------------------------------------|-------------------------------|----------------------------|-----------------------------------|----------------------|
|                          | Respre-<br>sentative-<br>ness of<br>the<br>exposed<br>cohort | Repre-<br>sentative-<br>ness of<br>non-<br>exposed | Ascertain-<br>ment<br>of<br>exposure | Determ-<br>ination<br>that<br>outcome<br>is not<br>present<br>initially | Study<br>Controls<br>for age,<br>sex | Assess-<br>ment of<br>outcome | Length of<br>Follow-<br>up | Adequ-<br>acy of<br>follow-<br>up |                      |
| Wilson et al, 2009       | Yes                                                          | Yes                                                | Yes                                  | Yes                                                                     | Yes                                  | Yes                           | Yes                        | No                                | Low                  |
| Buckley et al, 2010      | No                                                           | Yes                                                | Yes                                  | No                                                                      | Yes                                  | Yes                           | Yes                        | Yes                               | Medium               |
| Mok et al, 2011          | Yes                                                          | Yes                                                | Yes                                  | No                                                                      | Yes                                  | Yes                           | Yes                        | No                                | Medium               |
| Ogdie et al, 2014        | Yes                                                          | Yes                                                | Yes                                  | No                                                                      | Yes                                  | Yes                           | Yes                        | No                                | Medium               |
| Juneblad et al, 2016     | No                                                           | No                                                 | Yes                                  | No                                                                      | Yes                                  | Yes                           | Yes                        | No                                | Medium               |
| Lee et al, 2017          | Yes                                                          | Yes                                                | Yes                                  | Yes                                                                     | Yes                                  | Yes                           | Yes                        | No                                | Low                  |
| Dai et al, 2018          | Yes                                                          | Yes                                                | Yes                                  | Yes                                                                     | Yes                                  | Yes                           | Yes                        | No                                | Low                  |
| Skov et al, 2019         | Yes                                                          | Yes                                                | Yes                                  | Yes                                                                     | Yes                                  | Yes                           | Yes                        | No                                | Low                  |
| Elahouf et al, 2020      | Yes                                                          | No                                                 | Yes                                  | No                                                                      | Yes                                  | Yes                           | Yes                        | No                                | Medium               |
| Colaco et al, 2020       | Yes                                                          | Yes                                                | Yes                                  | No                                                                      | No                                   | Yes                           | Yes                        | Yes                               | Medium               |
| Karmacharya et al., 2021 | Yes                                                          | Yes                                                | Yes                                  | Yes                                                                     | Yes                                  | Yes                           | Yes                        | No                                | Low                  |

Supplementary File 2A. Risk of bias of the included psoriatic arthritis studies based on New-Castle Ottawa scale for observational studies

| Author, year          | Selection                                |                                   |                           | Comparability                                       |                             | Outcome               |                     |                       | Overall risk of bias |
|-----------------------|------------------------------------------|-----------------------------------|---------------------------|-----------------------------------------------------|-----------------------------|-----------------------|---------------------|-----------------------|----------------------|
|                       | Representativeness of the exposed cohort | Representativeness of non-exposed | Ascertainment of exposure | Determination that outcome is not present initially | Study Controls for age, sex | Assessment of outcome | Length of Follow-up | Adequacy of follow-up |                      |
| Mok et al., 2011      | Yes                                      | Yes                               | Yes                       | No                                                  | Yes                         | Yes                   | Yes                 | No                    | Medium               |
| Bakland et al., 2011  | Yes                                      | Yes                               | Yes                       | Yes                                                 | Yes                         | Yes                   | Yes                 | No                    | Low                  |
| Wright et al., 2015   | Yes                                      | Yes                               | Yes                       | Yes                                                 | Yes                         | Yes                   | Yes                 | No                    | Low                  |
| Haroon et al., 2015   | Yes                                      | Yes                               | Yes                       | Yes                                                 | Yes                         | Yes                   | Yes                 | No                    | Low                  |
| Exarchou et al., 2016 | Yes                                      | Yes                               | Yes                       | Yes                                                 | Yes                         | Yes                   | Yes                 | No                    | Low                  |
| Dregan et al., 2017   | Yes                                      | Yes                               | Yes                       | No                                                  | Yes                         | Yes                   | No                  | No                    | Medium               |
| Prati et al., 2017    | Yes                                      | Yes                               | Yes                       | No                                                  | Yes                         | Yes                   | Yes                 | Yes?                  | Low                  |
| Bae et al., 2019      | Yes                                      | Yes                               | Yes                       | Yes                                                 | Yes                         | Yes                   | No                  | No                    | Medium               |

Supplementary File 2B. Risk of bias of the included ankylosing spondylitis studies based on New-Castle Ottawa scale for observational studies

| No of studies                                     | Certainty assessment  |                      |                           |              |             | Effect                    | Certainty   |
|---------------------------------------------------|-----------------------|----------------------|---------------------------|--------------|-------------|---------------------------|-------------|
|                                                   | Study design          | Risk of bias         | Inconsistency             | Indirectness | Imprecision | RR (95% CI)               |             |
| <b>Psoriatic arthritis all-cause mortality</b>    |                       |                      |                           |              |             |                           |             |
| 10                                                | observational studies | serious <sup>a</sup> | very serious <sup>b</sup> | not serious  | not serious | RR<br>1.12 (0.96 to 1.30) | ⊕⊕○○<br>LOW |
| <b>Ankylosing spondylitis all-cause mortality</b> |                       |                      |                           |              |             |                           |             |
| 6                                                 | observational studies | serious <sup>a</sup> | Not serious               | not serious  | not serious | RR<br>1.64 (1.49 to 1.80) | ⊕⊕○○<br>LOW |

RR: relative risk, CI: Confidence interval

#### Explanations

- a. Observational studies, did not adjust mortality estimates or used administrative codes to make PsA diagnosis in some studies
- b. Variable results across studies, high I squared value (86%)
- c. Actual events not provided for all studies

Supplementary File 2C. GRADE certainty of evidence assessment of mortality in psoriatic arthritis and ankylosing spondylitis
